# Supplementary material
Source: Springer Nature journal article supplement (https://www.springermedizin.de/resource/supplementary/12998_2008_85_MOESM5_ESM.pdf/9623522)

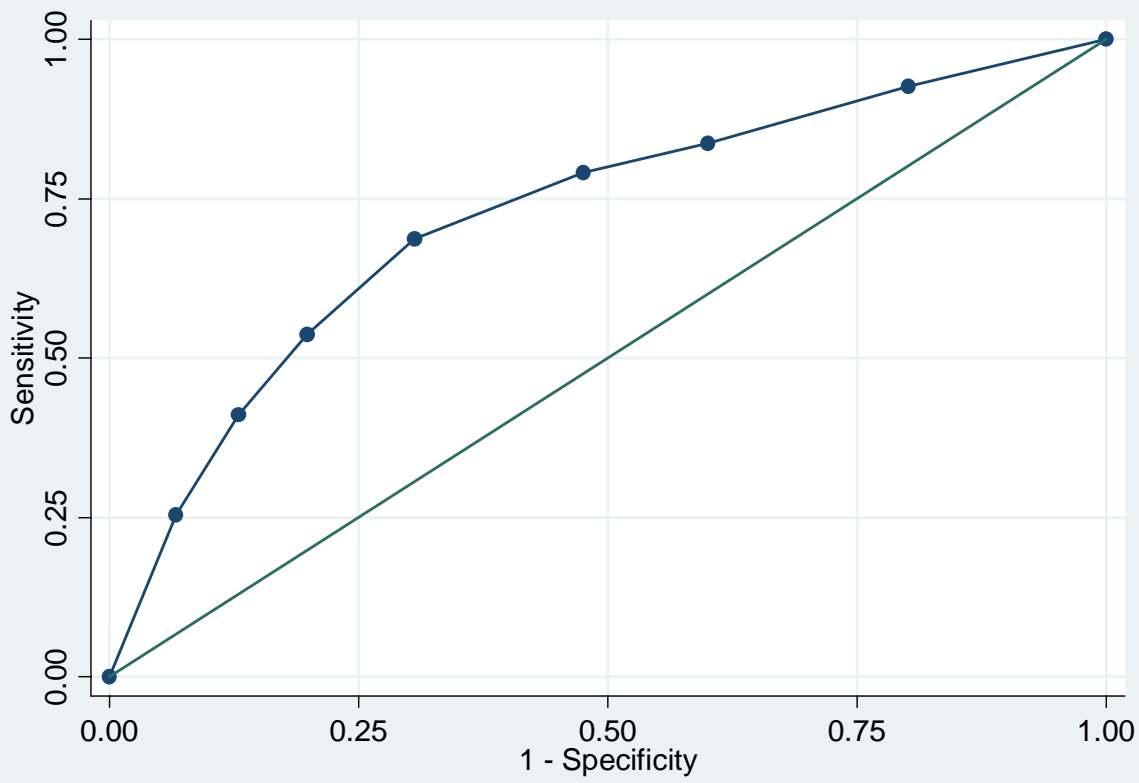

Area under ROC curve = 0.7234

Supplement: MOESM5 [file 9623522]
